# Supplementary material for: Empagliflozin Reduces the Progression of Hepatic Fibrosis in a Mouse Model and Inhibits the Activation of Hepatic Stellate Cells via the Hippo Signalling Pathway
Source: MDPI journal article supplement (doi:10.3390/biomedicines10051032), 2022-04-29
Supplement: s1 [file s1]

**Table S1.** Primer sequences used for quantitative real time-PCR

| <i>Gene</i>          | <i>Primer forward</i>      | <i>Primer reverse</i>      |
|----------------------|----------------------------|----------------------------|
| <b><u>Human</u></b>  |                            |                            |
| $\alpha$ -SMA        | TCCCTTGAGAAGAGTTACGAGTT    | ATGATGCTGTTGTAGGTGGTT      |
| Collagen1 $\alpha$ 1 | AAT CCA TCG GTC ATG CTC TC | GGC CCA GAA GAA CTG GTA CA |
| TGF- $\beta$         | GCAACAATTCCTGGCGTTACCT     | GAAAGCCCTGTATTCCGTCTCC     |
| Cyr61                | AGCCTCGCATCCTATACAACC      | TTCTTTCACAAGGCGGCACTC      |
| cTGF                 | CCAATGACAACGCCTCCTG        | TGGTGCAGCCAGAAAGCTC        |
| AREG                 | TCCACTCGCTCTTCCAACAC       | GGCATTTCACTCACAGGGGA       |
| PCNA                 | GCGTGAACCTCACCAGTATGT      | TCTTCGGCCCTTAGTGTAATGAT    |
| <b><u>Mouse</u></b>  |                            |                            |
| $\alpha$ -SMA        | CTGACAGAGGCACCACTGAA       | CATCTCCAGAGTCCAGCACA       |
| Collagen1 $\alpha$ 1 | GAGCGGAGAGTACTGGATCG       | GCTTCTTTTCCTTGGGGTTC       |
| TGF- $\beta$         | TTGCTTCAGCTCCACAGAGA       | TGGTTGTAGAGGGCAAGGAC       |
| MMP2                 | AGACACTGGTCGCAGTGATG       | AGCTCCTGGATCCCCTTGAT       |
| Cyr61                | GACTGCAGCAAACTCAGCC        | CCAAGACGTGGTCTGAACGA       |
| cTGF                 | GGCAACCCACTGATCCATCT       | GGGCAGAAAGTTGGTGTCTT       |
| AREG                 | GAATCGCTTTCTGGGGACCA       | ATAGCTGCGAGGATGATGGC       |

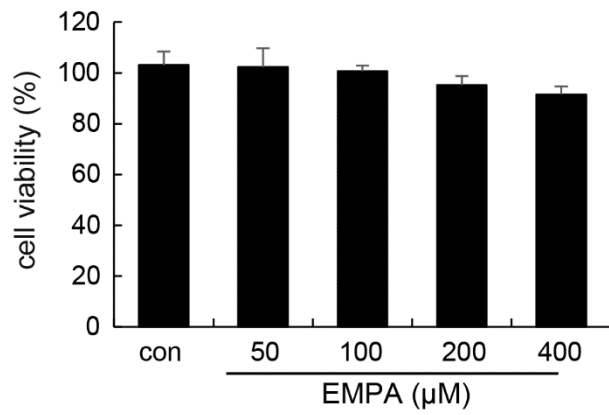

**Figure S1.** Empagliflozin exhibits no cytotoxic effect on LX-2. LX-2 cells were assessed for cytotoxic effects via the CCK-8 assay. LX-2 cells grown in a culture medium were treated with 50-400  $\mu\text{M}$  of EMPA, respectively, for 24 h. Data are presented as means  $\pm$  SD for the triplicate experiments.
